# Supplementary material for: Adipocyte-derived exosomal lncRNA related to Insulin Resistance in Obesity.
Source: Research Square preprint supplement (doi:10.21203/rs.3.rs-1993935/v1), 2022-10-17
Supplement: Supplementary file 1 [file 0daea2c5b9cc45d352cc0868.xlsx]

## Sheet: Sheet1
Table S2 The differentially expressed lncRNAs in blood exosomes from HFD mice with insulin resistance compared to controls
lncRNA_id	locus	Normalized signal (log2)						Fold change	P	Regulation
		HFD-1	HFD-2	HFD-3	NC-1	NC-2	NC-3
NONHSAT036750.2	14:49853722-49862853	3.89125	3.96888	4.5263	2.71696	4.81108	5.63853	6.07851	0.0451982	DOWN
NONHSAT168666.1	14:77024545-77028279	2.1899	2.866	2.80815	2.18085	3.18665	3.74771	4.21617	0.0458078	DOWN
NONHSAT175635.1	17:76734117-76737331	5.59642	5.52255	4.39797	2.56342	6.18841	6.60596	6.97232	0.0463206	DOWN
NONHSAT150046.1	1:171670280-171671097	1.72929	2.35686	2.75982	2.45253	2.95063	3.64184	4.09531	0.0465714	DOWN
NONHSAT155264.1	10:28583392-28596028	2.50828	2.76586	2.51913	2.32323	3.19118	3.9992	4.10536	0.0467356	DOWN
NONHSAT221415.1	9:133019432-133021175	2.27118	2.31155	2.72376	2.37722	3.17274	3.46837	4.23985	0.0469672	DOWN
NONHSAT202676.1	5:65925822-66012061	4.99261	5.21613	5.62713	2.38555	5.93859	6.4205	7.08252	0.0476359	DOWN
ENST00000629058	20:31721507-31723409	7.90709	7.68896	7.84952	2.15498	8.38926	8.97491	9.27733	0.0477612	DOWN
MSTRG.6034.2	15:41736449-41740135	5.64707	5.66201	6.09352	2.02478	6.24434	7.0306	7.08422	0.0478875	DOWN
NONHSAT094288.2	3:195998864-196005093	2.98781	2.69896	2.10689	2.05321	3.17023	3.65781	4.07388	0.0480475	DOWN
NONHSAT091194.2	3:112695401-112696156	5.78701	5.67007	5.8945	2.04099	6.29884	6.89626	7.13112	0.0492703	DOWN
NONHSAT138381.2	X:120560111-120594244	4.66412	4.77181	5.33984	2.09298	5.63001	5.71482	6.5386	0.0495566	DOWN
NONHSAT209033.1	6:34588904-34606618	1.24425	1.73655	2.5388	2.51848	3.12463	3.09992	3.54822	0.0496336	DOWN
NONHSAT094287.2	3:195998863-196005093	3.8021	3.40063	3.99462	2.21654	4.26374	4.92024	5.3281	0.0496464	DOWN
NONHSAT227384.1	1:181089272-181092083	5.57227	5.83403	6.00878	2.18249	6.34397	6.95576	7.35322	0.0499772	DOWN
NONHSAT234219.1	14:49891544-49894205	4.99955	5.21011	5.0624	6.34436	6.28999	6.5254	0.407049	0.000182973	DOWN
NONHSAT168588.1	14:66013028-66013834	2.80711	3.32575	3.13331	5.7282	5.49932	5.33861	0.185999	0.000329323	DOWN
NONHSAT258511.1	X:9714397-9721774	5.03439	4.95748	4.69285	7.15035	7.03143	7.20623	0.213308	0.000345347	DOWN
NONHSAT010889.2	10:1022601-1045247	2.22913	2.26432	2.01623	3.39967	3.20398	3.12372	0.475269	0.000693016	DOWN
ENST00000444752	9:35971344-35972318	1.19823	0.771292	0.799553	3.14631	2.98802	3.23973	0.218875	0.000707309	DOWN
NONHSAT113018.2	6:46754066-46758842	5.09018	5.40627	5.27078	6.43416	6.15636	6.50235	0.463177	0.00149517	DOWN
NONHSAT138063.2	X:103776576-103832228	2.38587	2.17079	2.63972	4.08804	3.94001	3.80188	0.344723	0.00151805	DOWN
NONHSAT246737.1	3:114316781-114326080	3.95414	3.88559	4.24842	5.15823	5.13287	5.31601	0.445492	0.00260751	DOWN
NONHSAT130018.2	9:3218302-3223008	4.16543	4.38288	4.49878	5.29794	5.2936	5.67308	0.473937	0.00312722	DOWN
NONHSAT175349.1	17:50109315-50111057	2.19588	2.14516	1.4278	4.32398	3.67158	4.06807	0.236063	0.0032268	DOWN
NONHSAT015456.2	10:87863571-87864546	2.19678	2.24382	2.22913	3.48699	3.43933	3.74811	0.394672	0.00444155	DOWN
NONHSAT063848.2	19:23047073-23054998	3.71484	3.85292	3.98285	4.98071	4.69236	5.16884	0.464553	0.00536353	DOWN
NONHSAT220554.1	9:20413965-20622440	1.74507	1.12267	0.758517	3.4168	3.10461	3.68764	0.2245	0.00569931	DOWN
NONHSAT089075.2	3:38490724-38493142	3.34368	3.50234	3.4328	4.63256	4.86793	5.1335	0.362288	0.00576673	DOWN
NONHSAT074752.2	2:143941126-143947130	2.45435	2.35196	1.83913	4.0742	3.83805	3.87075	0.309426	0.00604872	DOWN
NONHSAT013976.2	10:73495753-73520070	4.05072	4.01874	4.16472	5.24804	4.96901	5.38394	0.456582	0.00620238	DOWN
NONHSAT143903.2	16:80597923-80600446	2.08353	1.87659	2.40174	3.50815	2.98227	3.44492	0.437352	0.00626524	DOWN
NONHSAT238439.1	18:32018825-32142146	3.50317	3.38356	3.82766	4.91955	4.47668	5.07785	0.416827	0.00635597	DOWN
NONHSAT141167.2	16:24776993-24777327	2.83703	2.47785	2.69542	3.88929	3.78995	4.38721	0.387155	0.0066857	DOWN
NONMMUT132076.1	9:15134371-15136386	5.43709	5.68572	5.97809	6.80532	6.58416	7.15969	0.449955	0.00750764	DOWN
NONMMUT132121.1	9:21091756-21128787	4.86368	5.26646	5.36745	6.45063	6.56401	6.56913	0.393052	0.00916114	DOWN
NONMMUT132131.1	9:21518061-21519139	4.31404	4.9607	5.03856	6.13406	5.85316	6.43642	0.390865	0.0106186	DOWN
NONMMUT132143.1	9:22904132-22910492	1.93743	2.60119	2.59019	3.69661	3.39903	4.15719	0.384944	0.0115248	DOWN
NONMMUT132196.1	9:26961525-26962182	6.70818	7.03143	7.38362	8.23382	7.89027	8.49439	0.44761	0.0115763	DOWN
NONMMUT132304.1	9:36813142-36813909	0.832383	1.29488	1.83227	3.18567	3.54841	3.26967	0.25606	0.0116669	DOWN
NONMMUT132320.1	9:37555825-37603573	2.12921	2.36575	2.94239	3.93542	3.78078	4.21256	0.361799	0.0116832	DOWN
NONMMUT132479.1	9:46391865-46393098	1.46199	2.04628	1.1938	3.54768	3.58311	3.37056	0.26962	0.0122436	DOWN
NONMMUT132496.1	9:46709024-46709703	2.6281	2.70582	3.22896	3.84092	3.72395	4.15913	0.486298	0.0132582	DOWN
NONMMUT132555.1	9:54824433-54825511	5.18181	5.48892	5.74604	6.57105	6.42173	6.62762	0.482235	0.0136954	DOWN
NONMMUT132582.1	9:56251790-56267781	3.31942	3.56984	3.09313	4.71917	4.03885	4.47377	0.46758	0.0143349	DOWN
NONMMUT132626.1	9:58338533-58339174	2.52896	2.8698	3.27799	4.00579	3.82107	4.35428	0.449762	0.0146771	DOWN
NONMMUT132634.1	9:58504989-58509862	4.51374	5.33175	5.36154	6.31415	6.37419	7.01063	0.357606	0.0150246	DOWN
NONMMUT132727.1	9:64270798-64272650	1.73421	2.6292	1.9434	3.78184	3.09889	3.81893	0.366678	0.0155365	DOWN
NONMMUT132752.1	9:66050150-66051248	1.78375	2.06635	2.61687	3.34197	3.79651	3.19461	0.414748	0.0158328	DOWN
NONMMUT132989.1	9:84973067-84973470	4.69141	4.88484	4.19943	5.44454	5.85829	5.72261	0.477792	0.0164403	DOWN
NONMMUT133020.1	9:88456397-88463109	2.46314	2.44719	1.70973	3.56264	3.31401	3.77633	0.401506	0.016702	DOWN
NONMMUT133063.1	9:89381170-89382401	2.20135	2.25909	2.59813	3.79496	3.11503	3.82356	0.420708	0.0178315	DOWN
NONMMUT133355.1	9:96905402-96906440	4.18228	4.08508	4.74498	5.42287	5.14921	5.59289	0.489079	0.0179383	DOWN
NONMMUT133373.1	9:98872698-98873482	3.07993	3.43136	3.98718	5.10896	5.02708	5.29185	0.330245	0.0182043	DOWN
NONMMUT133380.1	9:99946254-99946774	5.25754	4.98634	4.51536	6.26173	6.15845	5.93762	0.443166	0.0183145	DOWN
NONMMUT133381.1	9:99946914-99947324	5.55842	5.09491	4.86533	6.43306	6.11719	6.04856	0.49749	0.0194149	DOWN
NONMMUT133409.1	9:102369170-102370649	4.468	4.12592	4.43486	5.58559	4.98923	5.66201	0.469412	0.0210653	DOWN
NONMMUT133671.1	9:118198532-118199539	3.63831	3.41395	4.13365	4.77061	4.73119	5.02744	0.470261	0.021127	DOWN
NONMMUT133708.1	9:120276079-120278034	6.48611	6.19221	5.68107	7.51533	7.15186	7.10215	0.462801	0.0223666	DOWN
NONMMUT133716.1	9:120664856-120665812	6.0607	6.49741	6.88239	7.64314	7.4139	7.83177	0.459798	0.0233705	DOWN
NONMMUT133752.1	9:122693679-122695428	3.09277	3.72895	4.18228	4.98447	4.95785	5.50292	0.369585	0.0241783	DOWN
NONMMUT133866.1	9:9645047-9646118	2.8924	2.67136	3.2669	3.9909	3.95561	4.03261	0.490181	0.0247863	DOWN
NONMMUT133958.1	9:21515909-21519175	6.98926	6.62652	6.22283	7.88687	7.59448	7.57325	0.484429	0.0250011	DOWN
NONMMUT134050.1	9:31053909-31054255	2.39687	2.63694	2.4871	4.21084	4.41566	3.49864	0.33409	0.0254572	DOWN
NONMMUT134163.1	9:41887920-41935958	3.08489	2.96768	1.68167	5.25676	4.99384	5.07919	0.187826	0.0271861	DOWN
NONMMUT134171.1	9:41947391-41948038	3.6332	4.16084	4.56075	5.45502	5.2892	5.61811	0.408041	0.027385	DOWN
NONMMUT134311.1	9:48519759-48521796	4.35793	4.40405	5.09437	5.62652	5.54168	5.92992	0.483214	0.0281569	DOWN
NONMMUT134322.1	9:50488883-50507852	2.35923	1.59927	1.50023	3.27725	2.85187	3.00678	0.440434	0.0297196	DOWN
NONMMUT134395.1	9:57099951-57131291	4.67666	4.95386	5.45774	6.31612	6.21192	6.16675	0.445458	0.0304842	DOWN
NONMMUT134675.1	9:72209091-72211327	2.04053	1.76769	2.5537	3.24431	3.36338	3.12836	0.469642	0.031173	DOWN
NONMMUT135033.1	9:91045738-91097127	2.88442	2.62939	2.02804	4.15229	3.45869	3.37556	0.450785	0.0315158	DOWN
NONMMUT135210.1	9:96809633-96811590	2.50965	3.40525	3.11307	4.37938	3.95787	4.16968	0.458915	0.0316383	DOWN
NONMMUT135295.1	9:102813360-102814155	0.848898	1.78873	2.34032	3.60719	3.37824	3.92619	0.273124	0.0331285	DOWN
NONMMUT135446.1	9:114577506-114578436	0.942651	1.1255	2.60206	3.69366	3.25254	4.21751	0.247738	0.0348988	DOWN
NONMMUT135749.1	X:12951044-12952875	1.18203	2.10407	2.37398	3.73816	3.40033	3.49525	0.334055	0.0362551	DOWN
NONMMUT135878.1	X:38622269-38623606	4.01802	4.04567	3.23434	5.01824	4.43282	5.05083	0.483367	0.0362928	DOWN
NONMMUT135943.1	X:57631625-57631972	3.39459	3.31243	2.5135	4.27798	4.11375	4.46624	0.444788	0.0373608	DOWN
NONMMUT136081.1	X:70362972-70363174	2.6358	1.37721	0.72549	4.36931	4.0032	4.19138	0.19039	0.0391908	DOWN
NONMMUT136229.1	X:95058823-95059063	3.88766	4.81644	4.88923	5.90404	5.8971	6.13577	0.382595	0.0396949	DOWN
NONMMUT136255.1	X:101471696-101475557	2.67529	2.82688	2.03267	3.51403	3.71923	3.54368	0.484735	0.0397277	DOWN
NONMMUT136346.1	X:128547349-128548521	7.49163	7.98463	8.46206	8.93354	8.86589	9.28372	0.497793	0.0467894	DOWN
NONMMUT136367.1	X:135850608-135851221	3.29028	3.05404	3.4538	4.75405	3.88704	4.09451	0.493447	0.0473828	DOWN
NONMMUT136440.1	X:142832527-142838241	1.9677	2.33532	3.08976	3.50858	4.2138	3.34021	0.436087	0.047434	DOWN
NONMMUT136587.1	X:159607465-159608511	1.3898	2.28246	2.46644	3.52941	3.52745	3.46885	0.381036	0.0475456	DOWN
NONMMUT136770.1	X:17511004-17514795	2.66844	1.36148	3.00957	4.37556	3.48143	4.59944	0.302307	0.0481301	DOWN
NONMMUT136801.1	X:19205644-19220313	2.43529	2.62688	2.43267	3.21403	3.61923	3.67368	0.424735	0.0367277	DOWN
NONMMUT136892.1	X:47275334-47276676	6.49163	7.68463	8.43621	8.73354	8.65886	9.08372	0.477793	0.0437894	DOWN
NONMMUT137134.1	X:85614839-85615225	3.09028	3.25404	3.5538	4.25405	3.8987	4.20451	0.433447	0.0413828	DOWN
NONMMUT137220.1	X:103560908-103623755	2.2677	2.13532	2.89764	3.20858	3.8138	3.54021	0.406087	0.042434	DOWN
NONMMUT137557.1	X:150486075-150486923	2.3898	2.08246	2.16644	3.02941	3.22745	3.16885	0.391036	0.0405456	DOWN
NONMMUT137558.1	X:150487052-150488719	2.86844	2.36148	3.20957	4.57556	3.68143	0.599444	0.280653	0.0431301	DOWN
NONHSAT036749.2	14:49853640-49862851	3.82866	3.7485	3.97562	2.18234	2.46799	2.27651	2.90819	0.00018751	UP
ENSMUSG00000041878.4	1:43131748-43132995	10.6726	11.0001	10.9871	8.24625	8.02703	7.68791	7.40909	0.000290562	UP
NONHSAT081052.2	21:8988105-8988751	10.8682	11.1522	11.1608	8.88923	8.69488	8.40321	5.24357	0.000321106	UP
NONHSAT203225.1	5:134374373-134390777	4.56324	5.04179	4.8593	2.66371	2.24437	2.75457	4.80315	0.000450203	UP
NONHSAT244075.1	21:8681787-8988754	10.4702	10.9937	10.9504	8.75875	8.39274	8.25477	5.05844	0.000518876	UP
NONHSAT176428.1	17:62033915-62065918	7.06776	6.87486	7.12544	5.8549	5.9858	6.04819	2.08698	0.00054112	UP
NONHSAT003605.2	1:61406562-61462787	6.3366	6.70818	6.79719	4.83908	4.82432	4.41232	3.79044	0.000638498	UP
ENST00000584058	3:15738515-15738809	9.70667	10.0602	10.3301	8.09623	7.86167	7.63313	4.52695	0.000950332	UP
ENST00000618786	14:49586580-49586878	11.1351	11.3549	11.2937	8.99352	8.5038	8.59132	5.86348	0.00095194	UP
ENST00000635274	14:49586579-49586878	3.27321	3.32617	3.73985	1.50011	1.88641	1.34796	3.64418	0.00104605	UP
NONHSAT208399.1	6:163414784-163478887	3.01871	3.47374	3.58929	0.861766	1.47974	0.9233	4.80571	0.00104625	UP
NONHSAT234422.1	14:74797601-74799651	8.89742	9.47528	9.68451	7.06901	6.5917	6.49009	6.27397	0.00119802	UP
NONHSAT235303.1	15:44524059-44536677	3.42872	3.90471	3.55488	2.21728	1.84472	2.06568	3.01715	0.00121606	UP
ENST00000363046	9:35657754-35658017	10.0378	10.5329	10.7857	8.08841	7.78761	7.62664	6.22217	0.00128937	UP
NONHSAT215583.1	8:26395281-26410913	11.5164	11.722	11.5626	9.46886	9.13652	8.94775	5.28674	0.00129866	UP
NONHSAT207579.1	6:85614876-85615173	6.58974	6.77007	7.18967	5.1335	4.85995	4.5176	4.0374	0.00132484	UP
NONHSAT185102.1	2:88857169-89027689	9.48611	10.0535	10.1607	7.76978	7.17245	6.96699	5.99767	0.00134401	UP
NONHSAT054942.2	17:58328938-58353286	5.25164	5.31561	5.61918	4.19645	3.87479	3.73828	2.74168	0.00134869	UP
NONHSAT172914.1	16:34153598-34160889	5.8659	5.9852	6.11307	4.46106	4.28429	3.97837	3.33295	0.00168076	UP
NONHSAT242715.1	2:170735671-170770768	8.12676	8.49766	9.02128	6.17211	6.09046	5.57542	6.17542	0.00184711	UP
NONHSAT134595.2	9:122844556-122848494	5.66709	5.95475	6.08497	4.37824	4.49233	4.29266	2.87301	0.00200539	UP
NONHSAT168272.1	14:32152439-32156407	5.38089	5.58754	5.75844	4.33484	4.57546	4.66292	2.07466	0.0020983	UP
NONHSAT172915.1	16:34160064-34175493	6.83144	7.17875	7.40701	5.59913	5.08692	4.92348	3.79839	0.00210535	UP
NONHSAT236535.1	16:34160044-34161697	4.81936	5.34174	4.98923	3.86807	3.59546	3.37667	2.71196	0.00241928	UP
NONHSAT162411.1	12:70346282-70354997	5.89253	6.40365	6.44562	4.70423	4.64463	4.33178	3.24675	0.0024992	UP
MSTRG.4050.1	12:19473323-19493982	6.03925	6.20618	6.45489	4.84966	4.68232	4.25447	3.08881	0.00258002	UP
NONHSAT258540.1	X:17731853-17737080	5.57743	5.89055	5.90173	4.57694	4.86187	4.91992	2.00511	0.00260125	UP
ENST00000534336	11:65497762-65506469	5.75313	5.64979	6.22691	4.29434	3.94302	4.16289	3.38362	0.00267204	UP
NONHSAT119380.2	7:19115231-19115861	5.61085	5.96177	6.3113	4.29266	4.05982	3.85463	3.75641	0.00274818	UP
NONHSAT243975.1	20:58910733-58911086	7.08564	7.3653	7.79003	5.94057	5.53085	5.36929	3.50396	0.00280815	UP
NONHSAT022124.2	11:65496267-65509085	5.54106	5.68107	6.07719	4.45271	4.02627	3.80264	3.17159	0.00284269	UP
NONHSAT203283.1	5:139326190-139330438	6.69221	6.6762	7.30859	4.91463	5.42506	4.91463	3.52614	0.00292711	UP
ENST00000550468	12:49265156-49273306	7.10874	7.41615	7.95341	5.77572	5.25214	5.06608	4.40426	0.00305744	UP
NONHSAT001270.2	1:18748617-18748875	11.5506	11.6934	11.5083	9.48429	9.16388	8.85491	5.26268	0.00306371	UP
NONHSAT246735.1	3:114314501-114316179	5.6516	6.03641	6.40849	4.36675	4.16156	3.85177	3.79219	0.00311984	UP
NONHSAT044219.2	15:60488284-60490924	6.03309	6.34524	6.4224	5.20016	4.99995	4.67149	2.4676	0.00316812	UP
NONHSAT193782.1	3:41239184-41240443	5.88011	5.91791	6.48611	4.67666	4.45142	4.05159	3.2638	0.00320554	UP
NONHSAT220912.1	9:83968911-83970794	8.09311	8.56013	8.86827	6.30479	5.99474	6.0641	5.32989	0.00362347	UP
ENST00000648308	14:32149176-32158008	6.23809	6.54114	6.99179	5.07734	4.60765	4.63232	3.5673	0.00362497	UP
ENSMUST00000028061	1:160074735-160077918	6.54279	6.85242	7.2235	5.39248	5.19424	4.98566	3.24783	0.00389866	UP
ENSMUST00000031305	5:118065360-118069710	6.41612	6.58416	7.12705	5.14204	4.77799	4.73552	3.59257	0.00392714	UP
ENSMUST00000031402	5:129787439-129845820	3.55758	3.45541	3.67838	2.36401	2.59662	2.15002	2.27352	0.00397673	UP
ENSMUST00000044500	13:89739460-89842373	8.30018	9.04432	9.27209	6.44695	6.30743	5.93247	6.42356	0.00401146	UP
ENSMUST00000049684	12:3236611-3249999	3.44867	3.84724	4.15646	1.98783	1.82054	2.20374	3.56404	0.00401642	UP
ENSMUST00000059704	3:19894886-19895962	6.21292	6.61412	6.91815	5.01845	4.67149	5.20181	3.09481	0.00406483	UP
ENSMUST00000065383	19:60144675-60162591	6.13534	6.56823	6.83831	5.16283	4.93209	4.56611	3.10546	0.00407396	UP
ENSMUST00000065740	7:121033252-121035096	4.63065	5.14096	5.26933	3.68136	3.11625	3.5621	2.96064	0.00407864	UP
ENSMUST00000067770	5:151368864-151369172	5.13887	5.23387	5.59184	4.0334	4.28747	4.36876	2.14089	0.00413176	UP
ENSMUST00000071067	8:84065236-84067287	5.21285	5.55589	5.78536	4.08644	3.66984	3.27585	3.53501	0.00429038	UP
ENSMUST00000071374	17:16972910-16973770	7.76588	8.07803	8.74697	6.31965	6.02456	5.50999	4.81529	0.00437186	UP
ENSMUST00000072769	3:122255958-122293547	3.31507	3.555	3.56185	1.74224	1.88094	2.29593	2.80711	0.00440018	UP
ENSMUST00000077874	2:90910713-90918050	3.37406	3.64699	4.03691	1.70712	1.18584	2.09335	4.00815	0.00454794	UP
ENSMUST00000079720	2:71719417-71730966	2.95525	3.57297	3.25006	1.98928	1.48848	1.23862	3.19289	0.00459503	UP
ENSMUST00000080911	9:44477924-44479733	8.53226	9.03948	9.36882	6.45326	6.5768	6.27948	5.97314	0.00464178	UP
ENSMUST00000081739	19:10199189-10202382	6.84434	7.29751	7.59239	5.55631	5.18821	5.29888	3.78588	0.00468994	UP
ENSMUST00000087588	17:45586120-45588377	3.42656	3.15824	3.74497	2.43148	1.91043	2.05394	2.48662	0.00478685	UP
ENSMUST00000090779	3:96245554-96248509	6.53935	7.18207	7.45346	5.37944	5.06835	4.57607	4.17545	0.00490729	UP
ENSMUST00000095105	4:45012830-45014399	5.56696	5.75734	6.30937	4.49185	3.79317	3.71871	3.65049	0.00497159	UP
ENSMUST00000095448	17:28523293-28525347	8.36789	8.89939	9.20823	6.49327	6.25465	6.22016	5.80663	0.00500681	UP
ENSMUST00000097355	10:20515327-20518164	6.48743	6.60117	7.10958	4.66806	4.74256	4.5475	4.299	0.00508472	UP
ENSMUST00000098658	9:61370797-61372193	5.90127	6.02755	6.51105	4.67774	3.85922	3.88808	3.93731	0.00516246	UP
ENSMUST00000098713	8:65085613-65129563	2.88113	3.13736	3.77126	1.74356	1.16182	0.980567	3.9449	0.00524034	UP
ENSMUST00000098778	7:18989554-18992774	3.67289	4.17852	4.3246	2.3259	1.65252	1.27356	4.81304	0.00543108	UP
ENSMUST00000100526	5:138363719-138388287	5.83986	6.28922	6.58775	4.89371	4.58107	4.12323	3.25884	0.00544712	UP
ENSMUST00000100641	5:134676490-134680145	7.48748	7.91517	8.39783	6.06011	5.64004	5.66709	4.52873	0.0054501	UP
ENSMUST00000101090	5:76928368-76928845	3.58017	3.62067	3.83931	2.70323	2.638	2.23223	2.21236	0.0056724	UP
ENSMUST00000111461	2:90910713-90918258	6.50549	6.88239	7.46895	5.16142	4.86339	4.56483	4.35838	0.0057805	UP
ENSMUST00000112103	1:135606447-135688105	5.93908	6.35339	6.7961	4.60388	4.76523	4.25661	3.59992	0.00609215	UP
ENSMUST00000112652	14:13918444-13949558	7.12293	7.41051	7.99585	5.80361	5.69087	5.30573	3.84036	0.00611166	UP
ENSMUST00000113671	X:101295839-101321348	5.72893	5.83433	6.47595	3.60124	3.85352	3.75017	4.9718	0.00622118	UP
ENSMUST00000115480	1:9560832-9631092	3.08593	3.82846	3.40174	1.63018	2.06484	2.0395	2.92052	0.00636548	UP
ENSMUST00000117584	11:14599314-14599862	4.77039	5.11247	5.51433	3.67411	3.83109	3.35489	2.89009	0.00657464	UP
ENSMUST00000118575	19:3798615-3852419	9.19194	9.66896	10.0698	7.25319	7.27601	7.03903	5.63406	0.00665697	UP
ENSMUST00000120716	5:84123313-84123591	7.14459	7.42673	8.12995	5.68143	5.48375	5.1224	4.53533	0.00683213	UP
ENSMUST00000122858	3:35933045-35942717	5.90259	5.85782	6.57582	4.52899	4.77279	4.23547	3.07836	0.00690256	UP
ENSMUST00000122926	13:21440471-21445934	5.17231	5.43149	6.03117	3.80264	3.70816	3.38238	3.8613	0.00711784	UP
ENSMUST00000122972	14:45587740-45598512	6.47518	6.86221	7.19049	5.28353	5.33069	5.03075	3.14057	0.0071471	UP
ENSMUST00000122987	10:39558496-39588452	8.46764	8.9871	9.45767	6.44405	6.49815	6.2001	6.23387	0.00726021	UP
ENSMUST00000123087	2:72979424-72988677	3.23716	3.54368	3.98593	1.84907	1.55251	2.38575	3.14022	0.00732304	UP
ENSMUST00000123107	4:101353783-101399181	5.11484	5.5498	5.82456	4.45506	3.99723	3.83291	2.64929	0.00749616	UP
ENSMUST00000123457	10:62340256-62349851	3.65153	3.75403	4.12568	2.70504	2.94361	2.7493	2.07828	0.0077486	UP
ENSMUST00000123592	11:24201418-24217601	6.73934	7.18967	7.8635	5.6513	4.91645	4.76363	4.51315	0.00781418	UP
ENSMUST00000123700	11:87755577-87757270	4.54273	4.61958	4.53881	3.17933	2.67906	3.08686	2.96894	0.00784849	UP
ENSMUST00000123882	11:117257649-117263437	6.80415	7.02448	7.55283	5.19489	5.39798	5.15113	3.7586	0.00803781	UP
ENSMUST00000124374	15:97766549-97768713	7.76524	8.0084	8.57621	6.3567	6.09479	6.07553	3.93467	0.00816656	UP
ENSMUST00000124462	11:103344753-103350124	5.01098	5.03244	5.4592	3.75734	3.6872	4.30254	2.36176	0.00825671	UP
ENSMUST00000124738	4:131899478-131920029	3.78923	4.00235	3.4769	2.73198	2.37437	2.92665	2.10914	0.00840735	UP
ENSMUST00000124818	11:6525625-6528441	5.64405	6.20946	6.43988	4.10387	4.27815	4.0061	4.00313	0.00848159	UP
ENSMUST00000124848	4:141347814-141350853	4.38508	4.79732	5.08756	3.29391	3.78968	3.20475	2.51705	0.00856162	UP
ENSMUST00000124897	7:18993553-19001222	3.04357	3.21205	3.68993	1.76289	2.02561	1.13431	3.14865	0.00874476	UP
ENSMUST00000125001	2:90908716-90917857	3.7186	3.9864	4.31536	3.15147	2.67569	2.92231	2.14055	0.00884527	UP
ENSMUST00000125056	1:130809977-130824084	7.89293	8.19727	8.67334	6.52103	6.46629	6.26448	3.65356	0.00891451	UP
ENSMUST00000125186	3:94959034-94962048	3.93666	4.14334	4.16388	3.25694	2.73057	3.03506	2.08698	0.00907747	UP
ENSMUST00000125518	2:26381526-26387258	5.63071	6.18349	6.42689	4.01376	4.26808	4.1598	3.90778	0.0093361	UP
ENSMUST00000125538	11:67112461-67120080	9.2672	9.99263	10.1278	7.4458	7.38585	7.28398	5.53591	0.0101515	UP
ENSMUST00000125685	7:68273839-68363089	4.50869	4.71559	5.14157	3.41319	3.0221	3.80662	2.57368	0.0102584	UP
ENSMUST00000125853	11:70611212-70613211	6.73064	7.12222	7.46358	5.42439	5.24372	5.37485	3.44992	0.0104726	UP
ENSMUST00000127150	2:45111138-45114087	7.34948	7.86824	8.32236	6.29502	5.82501	5.94271	3.64395	0.0106662	UP
ENSMUST00000127218	1:71652888-71662053	4.32238	4.35138	5.07868	3.50949	2.80815	2.77468	2.94079	0.0107605	UP
ENSMUST00000127359	14:46387519-46389282	4.49106	4.71158	5.18847	3.74095	3.59438	3.02846	2.53376	0.0110113	UP
ENSMUST00000127525	2:129205958-129226438	3.68388	3.84643	3.95051	2.39053	2.89073	2.894	2.12491	0.0111306	UP
ENSMUST00000128183	11:114219239-114238502	6.05241	6.37192	7.00378	4.92606	4.74916	4.44056	3.5126	0.0113198	UP
ENSMUST00000128800	4:150566869-150568544	6.32641	6.64222	7.2293	5.05223	4.91138	4.69617	3.70178	0.0113223	UP
ENSMUST00000128914	13:74008152-74009354	6.75224	7.20596	7.75068	5.497	5.22802	5.09801	4.02784	0.0116537	UP
ENSMUST00000128960	11:86201370-86211192	6.20562	6.64963	7.22457	5.08652	4.90895	4.56861	3.68961	0.0116705	UP
ENSMUST00000129441	11:87121567-87126905	3.31017	3.5907	4.61541	0.744951	2.03705	1.53055	5.36153	0.011822	UP
ENSMUST00000129579	4:148306853-148316569	4.58605	5.1455	5.01824	4.09105	3.61048	4.03885	2.00951	0.0119325	UP
ENSMUST00000129758	4:40269569-40270940	4.68995	5.3597	5.41146	3.58197	3.33176	3.54276	3.24753	0.0120989	UP
ENSMUST00000130089	2:156715952-156720826	5.46521	5.8454	6.37458	4.4789	4.25428	3.43249	3.5387	0.0121075	UP
ENSMUST00000130392	11:16935154-16951099	4.17812	4.27313	4.5333	3.34833	2.72221	3.28603	2.28328	0.0121673	UP
ENSMUST00000130416	2:110196889-110256131	4.6166	4.68618	5.28209	3.33228	3.59946	3.64569	2.56956	0.0124261	UP
ENSMUST00000130619	19:4125960-4132285	6.10453	6.02564	6.48795	5.0245	4.54	5.2971	2.35168	0.0130713	UP
ENSMUST00000130679	2:167691181-167697801	3.11891	3.14875	3.81773	2.38484	2.05443	1.64116	2.53343	0.0131766	UP
ENSMUST00000130777	6:31662220-31666131	2.938	3.40137	3.37854	1.02099	1.83235	0.728606	3.95029	0.0132793	UP
ENSMUST00000130875	6:35252716-35261637	3.31007	4.14102	3.71048	2.68234	1.9725	2.42518	2.58692	0.0133344	UP
ENSMUST00000131021	11:3142048-3143363	3.88977	4.3217	4.64057	3.11388	2.61913	2.06384	3.14843	0.0133797	UP
ENSMUST00000131221	11:58965748-58978050	3.4538	3.89085	3.80029	3.04251	2.43044	2.54107	2.0423	0.0135107	UP
ENSMUST00000131222	14:75843379-75844964	3.41897	3.71571	4.15128	1.02262	1.41082	2.30276	4.32262	0.0135413	UP
ENSMUST00000131314	19:6416810-6418606	3.80799	4.281	5.14756	1.66629	2.46436	2.60305	4.66486	0.0136004	UP
ENSMUST00000132019	8:66384623-66387535	3.7828	3.78889	4.06008	2.88645	2.18582	2.23715	2.65719	0.0136535	UP
ENSMUST00000132077	11:3639785-3647526	4.47848	4.81073	5.17513	3.53474	3.96472	3.6165	2.19135	0.0137646	UP
ENSMUST00000132296	11:97160990-97161675	5.94592	6.11769	6.60117	4.87589	5.14232	5.21735	2.23952	0.0137685	UP
ENSMUST00000132326	2:74703248-74712054	4.16376	4.12687	4.71774	3.4121	3.03997	3.33028	2.13316	0.0139692	UP
ENSMUST00000132378	11:57795519-57801414	5.25547	5.08652	5.81113	4.24593	3.89024	4.24376	2.43283	0.0140597	UP
ENSMUST00000132389	5:74093060-74095406	6.98857	7.19874	7.84759	5.45121	5.65786	5.43521	3.66699	0.0141757	UP
ENSMUST00000132553	4:33303569-33310137	5.1925	5.8041	6.14016	4.15099	3.89455	4.4539	2.98737	0.0145023	UP
ENSMUST00000132669	2:173581199-173629550	3.70475	3.0922	4.09926	1.29383	2.3495	1.99252	3.35772	0.0148195	UP
ENSMUST00000132692	2:38285307-38287291	4.14646	4.50101	4.83591	3.38372	3.22956	3.62173	2.145	0.0157221	UP
ENSMUST00000132822	12:71317621-71321660	4.2941	4.45069	4.81331	3.42142	3.47884	3.57149	2.06217	0.0158462	UP
ENSMUST00000133337	8:91800415-91807539	3.21107	3.48744	3.46328	2.30129	1.55774	2.15423	2.55638	0.015968	UP
ENSMUST00000133586	2:170405181-170407175	3.39421	4.06901	3.91267	2.45204	2.73549	2.78528	2.22638	0.016126	UP
ENSMUST00000134467	5:34650718-34652477	5.7842	5.94217	6.42132	5.10092	4.71539	5.27244	2.03848	0.0163611	UP
ENSMUST00000135037	11:64079484-64083259	5.17999	5.47106	5.93584	4.08893	4.59721	4.47248	2.2362	0.0166042	UP
ENSMUST00000135180	2:106642914-106643388	4.10301	4.37062	4.90011	2.44319	2.7961	3.47088	2.88562	0.0171214	UP
ENSMUST00000135244	2:75704770-75710024	4.88793	5.30507	5.86548	3.63914	3.81343	4.21617	2.82556	0.0176887	UP
ENSMUST00000135889	13:24597613-24604925	3.66434	3.76356	4.35428	2.1644	2.66804	3.03854	2.45152	0.0180944	UP
ENSMUST00000136051	11:82779831-82781042	3.23312	3.87738	4.75879	0.745885	1.24641	2.34945	5.59518	0.0181198	UP
ENSMUST00000136359	7:142575529-142578143	3.57506	3.74375	4.41028	2.56662	2.2498	2.40126	2.91781	0.0182474	UP
ENSMUST00000136503	6:17097941-17171465	4.13414	4.29897	4.68567	3.73771	3.05553	3.28472	2.00571	0.018618	UP
ENSMUST00000136542	11:120235234-120236122	7.54787	8.09908	8.65736	6.05214	5.84279	5.99596	4.6121	0.0186395	UP
ENSMUST00000136806	6:52175235-52215076	5.18939	5.74818	5.80954	4.38471	4.56111	4.77593	2.0353	0.0187575	UP
ENSMUST00000136990	19:59425104-59458635	3.20646	4.03433	4.25804	1.25677	1.37657	2.57319	4.09146	0.0188698	UP
ENSMUST00000137077	11:87701396-87705331	3.40525	3.92385	3.28459	1.64097	2.63485	1.96211	2.68531	0.0189612	UP
ENSMUST00000137176	2:131159537-131171342	4.18279	4.87677	4.71247	3.21519	3.44399	3.35577	2.42572	0.0190899	UP
ENSMUST00000137236	4:127035681-127049398	3.4872	3.92739	3.70018	2.87274	2.59782	2.08238	2.23842	0.0191258	UP
ENSMUST00000137349	2:26059010-26060275	5.82636	5.97809	6.38883	4.63967	4.43534	5.28769	2.37751	0.0192009	UP
ENSMUST00000137478	6:108577039-108660934	3.84724	4.10147	4.38613	3.07903	2.32066	2.03082	2.99264	0.0193258	UP
ENSMUST00000137579	19:4126029-4131732	4.28277	4.91097	5.04283	3.96254	3.2845	3.25006	2.36782	0.0194549	UP
ENSMUST00000137749	4:6688169-6704160	3.45339	3.73392	3.81931	2.53397	1.97899	2.77653	2.31376	0.0200274	UP
ENSMUST00000137830	17:71557062-71598746	3.33699	4.03545	4.07209	2.6364	2.33147	2.96633	2.2722	0.0201219	UP
ENSMUST00000138207	16:91611468-91623861	4.44481	4.71507	5.32367	3.26884	3.44432	3.95146	2.44735	0.0202502	UP
ENSMUST00000138361	4:156052715-156059802	4.12568	4.75975	4.94254	2.96647	3.15687	3.78636	2.46614	0.0203033	UP
ENSMUST00000138374	3:108018294-108025249	5.73117	6.12884	6.56009	4.9847	4.68875	5.26808	2.26548	0.020508	UP
ENSMUST00000138684	16:56886367-56889453	4.4247	4.13671	4.80208	3.26724	3.52128	2.59765	2.46531	0.0209189	UP
ENSMUST00000138926	7:3666252-3670278	3.71119	4.03212	4.40215	2.29505	2.61878	3.2385	2.46977	0.020981	UP
ENSMUST00000139662	1:162217623-162225550	4.77662	4.97033	5.63479	3.66931	3.68683	4.04896	2.57267	0.0213122	UP
ENSMUST00000139752	11:97048691-97051432	5.19306	5.55695	6.0736	4.38138	4.01191	4.72645	2.38008	0.021383	UP
ENSMUST00000139771	3:51276759-51278383	3.87165	4.58017	4.35558	3.39459	2.56508	2.35507	2.73915	0.0223407	UP
ENSMUST00000139987	19:4125960-4132305	4.08234	4.23044	4.96557	2.8994	3.29152	2.94572	2.68284	0.0225693	UP
ENSMUST00000140028	5:128579106-128585378	7.84853	8.55232	9.07887	6.81998	6.65829	6.35798	3.87368	0.0228414	UP
ENSMUST00000140069	11:57795606-57801398	6.16345	6.7692	6.93542	5.24122	5.53899	5.80361	2.16268	0.022953	UP
ENSMUST00000140669	8:66439455-66442809	4.71475	5.2167	5.54087	3.78906	4.21395	3.96235	2.29315	0.0229756	UP
ENSMUST00000140954	X:105041401-105070124	4.13116	4.49185	4.86724	2.90373	3.19951	3.76831	2.28443	0.0230418	UP
ENSMUST00000141000	1:61378432-61395904	6.00296	6.53662	7.09216	4.59024	4.50775	5.55947	3.12152	0.023085	UP
ENSMUST00000141090	4:132351934-132352933	3.43012	4.10174	4.53168	2.43023	2.10263	2.19237	3.58306	0.0231163	UP
ENSMUST00000141679	6:29985331-29993776	3.84395	4.3246	4.34743	2.28103	3.07173	3.17032	2.45856	0.023136	UP
ENSMUST00000141700	6:128951204-128975029	4.81309	4.63371	5.39626	3.97809	3.71647	2.98863	2.58002	0.0231523	UP
ENSMUST00000141741	8:25037052-25041757	5.34174	5.8852	6.50414	4.04578	4.15389	4.86771	2.99824	0.0238924	UP
ENSMUST00000142067	19:36619418-36689479	4.72169	5.31924	5.46815	3.88835	3.95482	4.47569	2.10367	0.0240406	UP
ENSMUST00000142723	10:39560025-39613667	4.69156	4.9782	5.56548	3.43436	4.03691	4.13682	2.33655	0.0242224	UP
ENSMUST00000142871	5:100840797-100847167	2.93591	3.39144	3.55994	1.73126	2.2973	2.54163	2.12973	0.0243556	UP
ENSMUST00000142937	2:167858585-167862542	3.94243	4.4582	4.70593	3.11311	3.00565	3.20696	2.44828	0.0244226	UP
ENSMUST00000143129	X:19156981-19167232	5.07177	5.32946	5.84361	4.04933	4.55312	4.54196	2.07281	0.0247798	UP
ENSMUST00000143595	19:58204139-58236047	3.53136	3.6348	4.41407	2.82962	2.27125	2.6282	2.50034	0.0248243	UP
ENSMUST00000143649	2:167827693-167833646	4.34087	4.69687	5.1922	3.65453	3.33479	3.827	2.24439	0.0248299	UP
ENSMUST00000143828	17:71588557-71598253	3.49109	3.89869	4.14797	2.36354	3.10073	2.94518	2.04826	0.0250996	UP
ENSMUST00000143877	10:39595859-39613682	3.54679	3.06387	3.34921	2.43359	2.01954	1.44969	2.48103	0.0252289	UP
ENSMUST00000144178	2:129297370-129307826	5.64443	5.98454	6.4573	4.72502	4.92606	5.21654	2.13983	0.0253667	UP
ENSMUST00000144366	X:105043803-105070055	6.17211	6.46553	6.87367	5.30671	5.49254	5.51676	2.13022	0.0254404	UP
ENSMUST00000144407	4:119223174-119224815	6.0641	6.29346	6.66553	5.29005	4.88352	5.693	2.05072	0.0258067	UP
ENSMUST00000144487	18:21651448-21655148	4.00579	4.04387	4.20327	2.60902	3.07769	3.30468	2.08721	0.0259304	UP
ENSMUST00000144545	13:78199778-78231977	5.79153	6.34048	6.5062	4.9782	4.98566	5.59396	2.03871	0.0260436	UP
ENSMUST00000144745	6:128438757-128475617	2.95236	3.51822	3.68166	1.38077	1.78356	2.52337	2.71527	0.026537	UP
ENSMUST00000144818	2:156571792-156577457	4.77573	5.47551	5.74578	3.72234	3.90112	4.48146	2.48717	0.0266277	UP
ENSMUST00000144932	5:116026846-116029230	7.07278	7.45036	8.13974	6.18643	5.49466	6.51871	2.82222	0.0266808	UP
ENSMUST00000145042	5:148990056-148995223	5.67698	6.0063	6.48474	4.59001	4.4524	5.34491	2.36665	0.0267496	UP
ENSMUST00000145111	6:54269681-54430221	3.72689	4.42608	4.58745	3.45349	2.90322	2.87534	2.2806	0.0268626	UP
ENSMUST00000145346	11:67195680-67199234	6.23372	6.60763	7.28501	5.324	5.02025	5.57197	2.73763	0.0270714	UP
ENSMUST00000145435	11:69684501-69691141	6.61079	6.0493	6.83359	5.5278	5.23534	5.29817	2.2575	0.0271316	UP
ENSMUST00000145613	13:78198017-78235733	4.00383	4.45553	4.66043	2.45777	2.03858	3.34277	3.20404	0.0272005	UP
ENSMUST00000145894	X:7651106-7657258	3.53883	3.5635	4.17103	2.0357	3.0237	2.39176	2.3717	0.0272006	UP
ENSMUST00000145941	X:8042943-8072241	3.19924	3.5087	3.47333	1.6544	2.52246	2.24577	2.3227	0.0272139	UP
ENSMUST00000146218	11:3193516-3194263	3.74297	3.68487	4.33853	2.00289	2.40732	3.10652	2.59295	0.0275493	UP
ENSMUST00000146232	7:30641001-30664937	4.37698	4.5309	5.2015	3.56459	3.05883	3.91116	2.29178	0.0281654	UP
ENSMUST00000146701	12:109545398-109571726	3.75948	3.31309	4.26168	1.80631	2.64753	2.75865	2.58084	0.0282139	UP
ENSMUST00000146766	6:31102846-31104646	3.1924	3.4121	4.15439	2.21668	2.04625	2.7051	2.45716	0.0283999	UP
ENSMUST00000146938	9:53667246-53681265	5.05923	5.62035	5.90363	4.22178	4.38815	4.74857	2.14195	0.0288676	UP
ENSMUST00000146982	4:117975036-117993972	6.00774	6.3558	6.75518	5.19604	5.47392	5.38028	2.07137	0.0295428	UP
ENSMUST00000147198	7:92734166-92741459	5.71958	5.93615	6.55107	4.69375	4.94254	5.34851	2.13296	0.0295937	UP
ENSMUST00000147235	2:73584860-73589208	5.21705	5.01629	5.51574	3.37374	4.02661	4.38694	2.42323	0.0297055	UP
ENSMUST00000147425	2:119594297-119600746	5.38691	5.83381	6.02499	4.45626	4.13194	5.08337	2.23468	0.0298722	UP
ENSMUST00000147542	6:88842854-88847274	3.9487	3.90762	4.61314	2.47194	2.42267	3.42052	2.54071	0.0299605	UP
ENSMUST00000147633	19:4125959-4131727	3.02577	3.11388	3.88958	0.77131	2.16107	1.79845	3.2743	0.0303714	UP
ENSMUST00000147638	15:58214475-58324053	5.04711	5.31995	5.76347	4.22648	4.24792	4.35487	2.18849	0.0304421	UP
ENSMUST00000147681	X:96239966-96243636	3.37965	4.20431	4.38303	2.33249	2.69037	3.02482	2.53218	0.0307511	UP
ENSMUST00000147704	13:24366776-24375950	4.85076	4.9107	5.79293	3.46757	3.96804	4.24704	2.50279	0.0309203	UP
ENSMUST00000147762	11:6525591-6528760	5.38868	6.00541	6.24711	4.46424	5.11271	4.82986	2.13939	0.0311599	UP
ENSMUST00000148057	11:109437172-109438145	6.98269	7.12293	7.912	6.00115	5.78843	6.54604	2.38154	0.0312979	UP
ENSMUST00000148230	2:31146457-31152291	4.86381	5.29185	5.81883	3.42401	3.7785	4.54222	2.61204	0.0319938	UP
ENSMUST00000148807	19:4125979-4131735	4.29673	4.82591	5.14321	3.59421	3.40659	3.53014	2.43487	0.0320415	UP
ENSMUST00000149172	16:91465104-91470121	7.48528	7.93864	8.38013	6.65439	6.69343	6.99789	2.28193	0.0321003	UP
ENSMUST00000149246	12:22953999-23010284	3.42381	3.08886	3.90935	2.27374	2.76752	2.40185	2.02397	0.0321887	UP
ENSMUST00000149386	9:40780742-40784181	2.90662	3.60997	3.9898	0.740913	0.723322	2.3359	4.25232	0.032281	UP
ENSMUST00000149681	16:17152630-17153704	4.32838	5.07248	5.44131	3.03647	3.57758	4.01947	2.67291	0.0326934	UP
ENSMUST00000149848	4:9283972-9287391	4.63157	4.49636	5.30309	3.85649	3.69661	3.51627	2.2328	0.0327032	UP
ENSMUST00000149873	X:169320622-169368190	6.72541	6.96428	7.4549	6.16965	6.02312	5.93287	2.05004	0.0328131	UP
ENSMUST00000150038	19:10198368-10202384	3.91603	4.50775	4.90428	2.81132	2.00654	3.42511	3.11267	0.0329197	UP
ENSMUST00000150314	6:32511073-32515576	3.76025	4.36129	5.05877	2.39169	2.43824	3.44746	3.12532	0.0329644	UP
ENSMUST00000150561	6:34419396-34445435	3.58779	4.22203	4.78545	2.55041	2.05594	3.26367	2.96954	0.0329668	UP
ENSMUST00000150627	19:4125960-4132307	4.81162	5.2193	5.68519	3.83501	3.59102	4.56062	2.33954	0.0330234	UP
ENSMUST00000151051	2:129182482-129183947	9.89564	10.6669	10.8595	8.95626	8.83759	9.73657	2.45462	0.033569	UP
ENSMUST00000151136	17:34976899-34981788	6.61412	7.19929	7.42673	5.88959	5.71099	6.46727	2.08336	0.0337419	UP
ENSMUST00000151220	13:24905593-24914272	4.51018	4.79962	5.26186	3.75932	3.7363	3.91644	2.12081	0.0337575	UP
ENSMUST00000151650	11:112677406-112711362	6.29409	6.75191	7.35532	5.00177	5.76171	5.77732	2.47974	0.0338775	UP
ENSMUST00000151896	4:149347885-149365277	6.05167	6.35267	7.03208	5.23062	5.12992	4.95748	2.69156	0.0341841	UP
ENSMUST00000152031	7:104315019-104324667	6.74282	6.89165	7.61158	5.91295	5.75459	6.23503	2.22306	0.034263	UP
ENSMUST00000152524	2:14070332-14073934	5.43149	5.83594	6.14454	4.70239	4.73664	4.75952	2.14359	0.0344739	UP
ENSMUST00000153313	11:3639794-3647530	3.70951	4.46283	4.82164	2.75318	2.65881	3.50738	2.5958	0.0345299	UP
ENSMUST00000153522	9:24296139-24300257	3.63092	3.78013	4.13626	1.93357	2.92468	2.78429	2.38835	0.0345532	UP
ENSMUST00000153726	2:114654425-114697839	4.00092	4.74733	4.98089	3.32539	3.02318	3.77267	2.33958	0.0346323	UP
ENSMUST00000153814	4:123905062-123917269	5.8454	6.37161	6.72541	5.24033	5.01064	5.602	2.07504	0.0351708	UP
ENSMUST00000153951	4:115133832-115137864	4.89567	5.29651	5.72632	4.10998	3.90347	4.71005	2.08901	0.0353104	UP
ENSMUST00000154173	2:128317465-128429170	3.71944	4.10766	4.69902	2.96493	2.22688	3.3089	2.51735	0.035577	UP
ENSMUST00000154305	5:128579106-128600687	3.26098	3.48429	3.7275	1.49185	2.6321	1.62985	2.81034	0.03558	UP
ENSMUST00000154314	16:11688169-11691857	5.22509	5.7043	6.12424	3.97204	4.31546	5.00088	2.35567	0.0356639	UP
ENSMUST00000154334	X:105038817-105070042	4.40986	4.96494	5.05901	3.67911	3.26972	4.20665	2.09748	0.0357864	UP
ENSMUST00000155906	6:48738346-48740621	9.68966	10.4152	10.7988	8.80368	8.64426	9.48851	2.53802	0.0358863	UP
ENSMUST00000155949	2:29245107-29252993	7.56606	8.20464	8.54877	7.03755	6.63818	7.06332	2.35521	0.0359856	UP
ENSMUST00000156068	11:71031941-71033513	8.2526	8.92104	9.52797	6.92604	7.04783	8.01889	2.97681	0.0361695	UP
ENSMUST00000156260	10:81409575-81411579	2.95473	3.14472	3.56372	0.746691	2.19155	1.44593	3.16841	0.036247	UP
ENSMUST00000156443	6:144481225-144501416	7.48605	7.97394	8.47431	6.79484	6.56567	7.15776	2.25605	0.0364547	UP
ENSMUST00000156905	6:39419887-39420902	9.16852	9.9638	10.1103	8.46341	8.24415	8.48749	2.6396	0.0366263	UP
ENSMUST00000156937	5:72203353-72229611	6.23736	6.39281	7.17481	4.97074	5.38281	5.85584	2.32041	0.0370081	UP
ENSMUST00000159117	1:178321108-178324171	3.31217	3.46119	3.83274	2.07343	1.84456	2.87439	2.32565	0.0370148	UP
ENSMUST00000159404	1:161035167-161038246	4.77743	5.10405	5.2235	3.38223	3.70127	4.37867	2.24205	0.0371414	UP
ENSMUST00000159544	6:113070774-113077333	5.31889	6.05281	6.30241	4.28683	3.55781	4.97836	2.94858	0.0376873	UP
ENSMUST00000159701	1:169932698-169934248	6.5945	7.01687	7.51533	5.60673	6.20562	6.16931	2.10329	0.0378992	UP
ENSMUST00000160099	5:123137471-123140289	5.40106	5.75665	5.90886	3.89423	3.90896	4.94615	2.57589	0.0380191	UP
ENSMUST00000160227	5:123134292-123139347	6.05028	6.51134	6.94417	5.22127	5.46521	5.56295	2.17962	0.0381235	UP
ENSMUST00000160420	4:124937065-124944655	6.5457	7.10578	7.47912	5.69831	5.93615	6.03759	2.29018	0.0382622	UP
ENSMUST00000160545	17:7930545-7945889	3.90347	4.41716	4.96739	3.22974	2.69629	3.6166	2.40377	0.0383222	UP
ENSMUST00000160564	1:133906531-133914822	5.36452	5.93104	6.34048	4.83438	4.35204	5.09636	2.2035	0.0383746	UP
ENSMUST00000160967	6:124530911-124542310	3.99283	4.44735	4.50594	2.80163	3.01445	1.61847	3.33592	0.0385286	UP
ENSMUST00000161096	18:5565650-5593505	6.33695	6.64474	7.15453	5.07277	5.07359	6.07478	2.40005	0.0385533	UP
ENSMUST00000161150	1:85111812-85114025	6.39891	6.86076	7.28815	5.69159	5.68971	6.0535	2.10297	0.0385667	UP
ENSMUST00000161614	16:25956475-25960342	5.25979	5.79111	6.13183	4.56795	4.60724	4.95955	2.06812	0.0387619	UP
ENSMUST00000161841	10:70284235-70284953	4.62118	5.07077	5.31818	3.46422	3.74297	4.43765	2.1285	0.0393827	UP
ENSMUST00000161923	1:85326729-85342615	6.92811	7.51409	7.8654	6.20847	6.20345	6.72261	2.12345	0.0394069	UP
ENSMUST00000162103	5:21951858-21952499	3.36753	3.32021	3.53627	2.59629	1.84977	2.55497	2.05502	0.0394528	UP
ENSMUST00000162347	1:85246851-85255465	10.0203	10.7881	10.9773	9.0349	8.99471	9.93082	2.39852	0.0394936	UP
ENSMUST00000162450	13:59769966-59773680	3.60163	5.99809	4.34344	1.9729	0.819954	2.77984	7.67239	0.0395606	UP
ENSMUST00000163077	16:33794392-33796096	5.34729	5.37961	5.76587	4.32101	4.20389	3.11212	2.90578	0.0402199	UP
ENSMUST00000163208	4:123905230-123905508	3.39102	3.42704	3.89719	1.51486	2.48044	2.60955	2.4857	0.0403195	UP
ENSMUST00000163731	8:27042382-27042997	6.38244	6.89799	7.34287	5.56816	5.74143	5.99242	2.21757	0.0408483	UP
ENSMUST00000164249	1:160074735-160077985	3.97562	4.57607	4.92485	3.11672	3.56554	3.59308	2.14724	0.0409209	UP
ENSMUST00000165145	13:67360671-67365679	5.95947	6.40148	6.77303	5.22576	4.70915	5.74028	2.1885	0.0411352	UP
ENSMUST00000165858	9:57825945-57834295	5.36532	5.77351	6.31838	4.35909	4.86165	5.05847	2.11925	0.041318	UP
ENSMUST00000166229	8:81013576-81038584	3.83677	4.40917	4.83009	3.07604	3.32837	3.03673	2.39769	0.0416884	UP
ENSMUST00000166290	15:56693552-56778399	4.96393	5.36967	5.82052	3.74555	4.03772	4.78504	2.24832	0.0417719	UP
ENSMUST00000166826	7:30564737-30565356	8.62111	9.27733	9.75109	7.77632	7.66248	8.46073	2.4233	0.0421448	UP
ENSMUST00000168012	12:3403878-3427011	3.13676	4.08428	4.61777	1.05627	2.40914	2.59581	3.74431	0.0421474	UP
ENSMUST00000168187	18:6213913-6227324	3.18062	4.03744	4.68677	2.37616	1.84107	2.75703	3.29866	0.0424499	UP
ENSMUST00000168775	2:129373129-129375077	4.25812	4.90627	5.31006	3.5563	3.43758	4.02829	2.28172	0.0430466	UP
ENSMUST00000168978	17:34026034-34031572	5.59974	6.13083	6.52173	4.34274	4.48011	5.45398	2.4346	0.0430693	UP
ENSMUST00000169055	19:4125934-4132285	5.50585	5.41146	5.92339	4.54877	3.98408	3.06514	3.12378	0.0431708	UP
ENSMUST00000169111	1:172549258-172558129	6.79484	7.32726	7.82649	5.9293	6.15601	6.40114	2.30028	0.0432426	UP
ENSMUST00000169146	17:57041775-57047143	4.23218	3.99397	4.56434	2.46808	2.09498	3.44873	2.81733	0.043388	UP
ENSMUST00000169600	1:160074970-160077942	3.08081	3.24097	3.93303	2.49147	2.15423	2.67743	2.0149	0.0436614	UP
ENSMUST00000170214	9:123678096-123701046	3.56081	4.5075	4.66862	1.27367	2.08566	3.19259	3.79495	0.044228	UP
ENSMUST00000170435	2:27189382-27234710	10.4971	11.1297	11.0681	9.60155	9.32985	10.3577	2.13461	0.0446569	UP
ENSMUST00000170933	4:108633843-108637441	4.61392	5.25617	5.66462	3.47264	4.41381	4.07191	2.30387	0.0447857	UP
ENSMUST00000171483	2:120866328-120866651	3.07556	3.32372	4.2988	1.04472	1.22749	2.67992	3.52588	0.0449818	UP
ENSMUST00000171743	19:4125987-4131730	8.34296	9.1842	9.60699	7.35071	7.40954	8.22317	2.66782	0.045034	UP
ENSMUST00000172588	6:72609836-72616190	10.4054	10.9871	11.0732	9.41051	9.22154	10.2708	2.20484	0.0451079	UP
ENSMUST00000172796	17:34200027-34205449	7.2718	7.87659	8.22414	6.66515	6.4937	6.7579	2.29657	0.0451577	UP
