# Supplementary material for: Adipocyte-derived exosomal lncRNA related to Insulin Resistance in Obesity.
Source: Research Square preprint supplement (doi:10.21203/rs.3.rs-1993935/v1), 2022-10-17
Supplement: Supplementary file 2 [file 7408e1b205d9af8d28a7a2dd.docx]

**Table S1. Primers used in this study for siRNA**

| **Primer** | **Sequence** |
| --- | --- |
| AK018453 | F： 5’- GUUCCACUCACUUCUUUGATT-3’  R: 5’- UCAAAGAAGUGAGUGGAACTT-3’ |

**Table S2. Primers used in this study for qRT-PCR**

| **Primer** | **Sequence** |
| --- | --- |
| TMEM18  PPARγ  C/EBPα  FABP4  C/EBPβ | F： 5’- CTCCTCACCTGCTTGTCCTC -3’  R: 5’- ATCTCCAGTTCATCGCAGCC -3’  F： 5’-GCTGTGCAGGAGATCACAGA-3’  R: 5’-GGGCTCCATAAAGTCACCAA-3’  F： 5’-GGGTCTCTAGTTCCACGCCT-3’  R: 5’-CCCATCGCAGTGAGTTCCG-3’  F： 5’-GGTGGTGGAATGCGTCATG-3’  R: 5’-CAACGTCCCTTGGCTTATGC-3’  F： 5’- GACAAGCACAGCGACGAGTA-3’  R: 5’ -AGCTGCTCCACCTTCTTCTG-3’ |
| AC092159.2 | F： 5’-AGCTGACAGAGAAGGCGGAC-3’  R: 5’-CAAGTTTCGTGAGAAGGGCAGA-3’ |
